# Supplementary material for: Histone methyltransferase DOT1L coordinates AR and MYC stability in prostate cancer
Source: PubMed Central journal article supplement (PMC7438336; doi:10.1038/s41467-020-18013-7), 2020-08-19
Supplement: 41467_2020_18013_MOESM1_ESM.pdf [file 41467_2020_18013_MOESM1_ESM.pdf]

# **Histone Methyltransferase DOT1L Coordinates AR and MYC Stability in Prostate Cancer**

Vatapalli et al.

# Supplementary Fig 1.

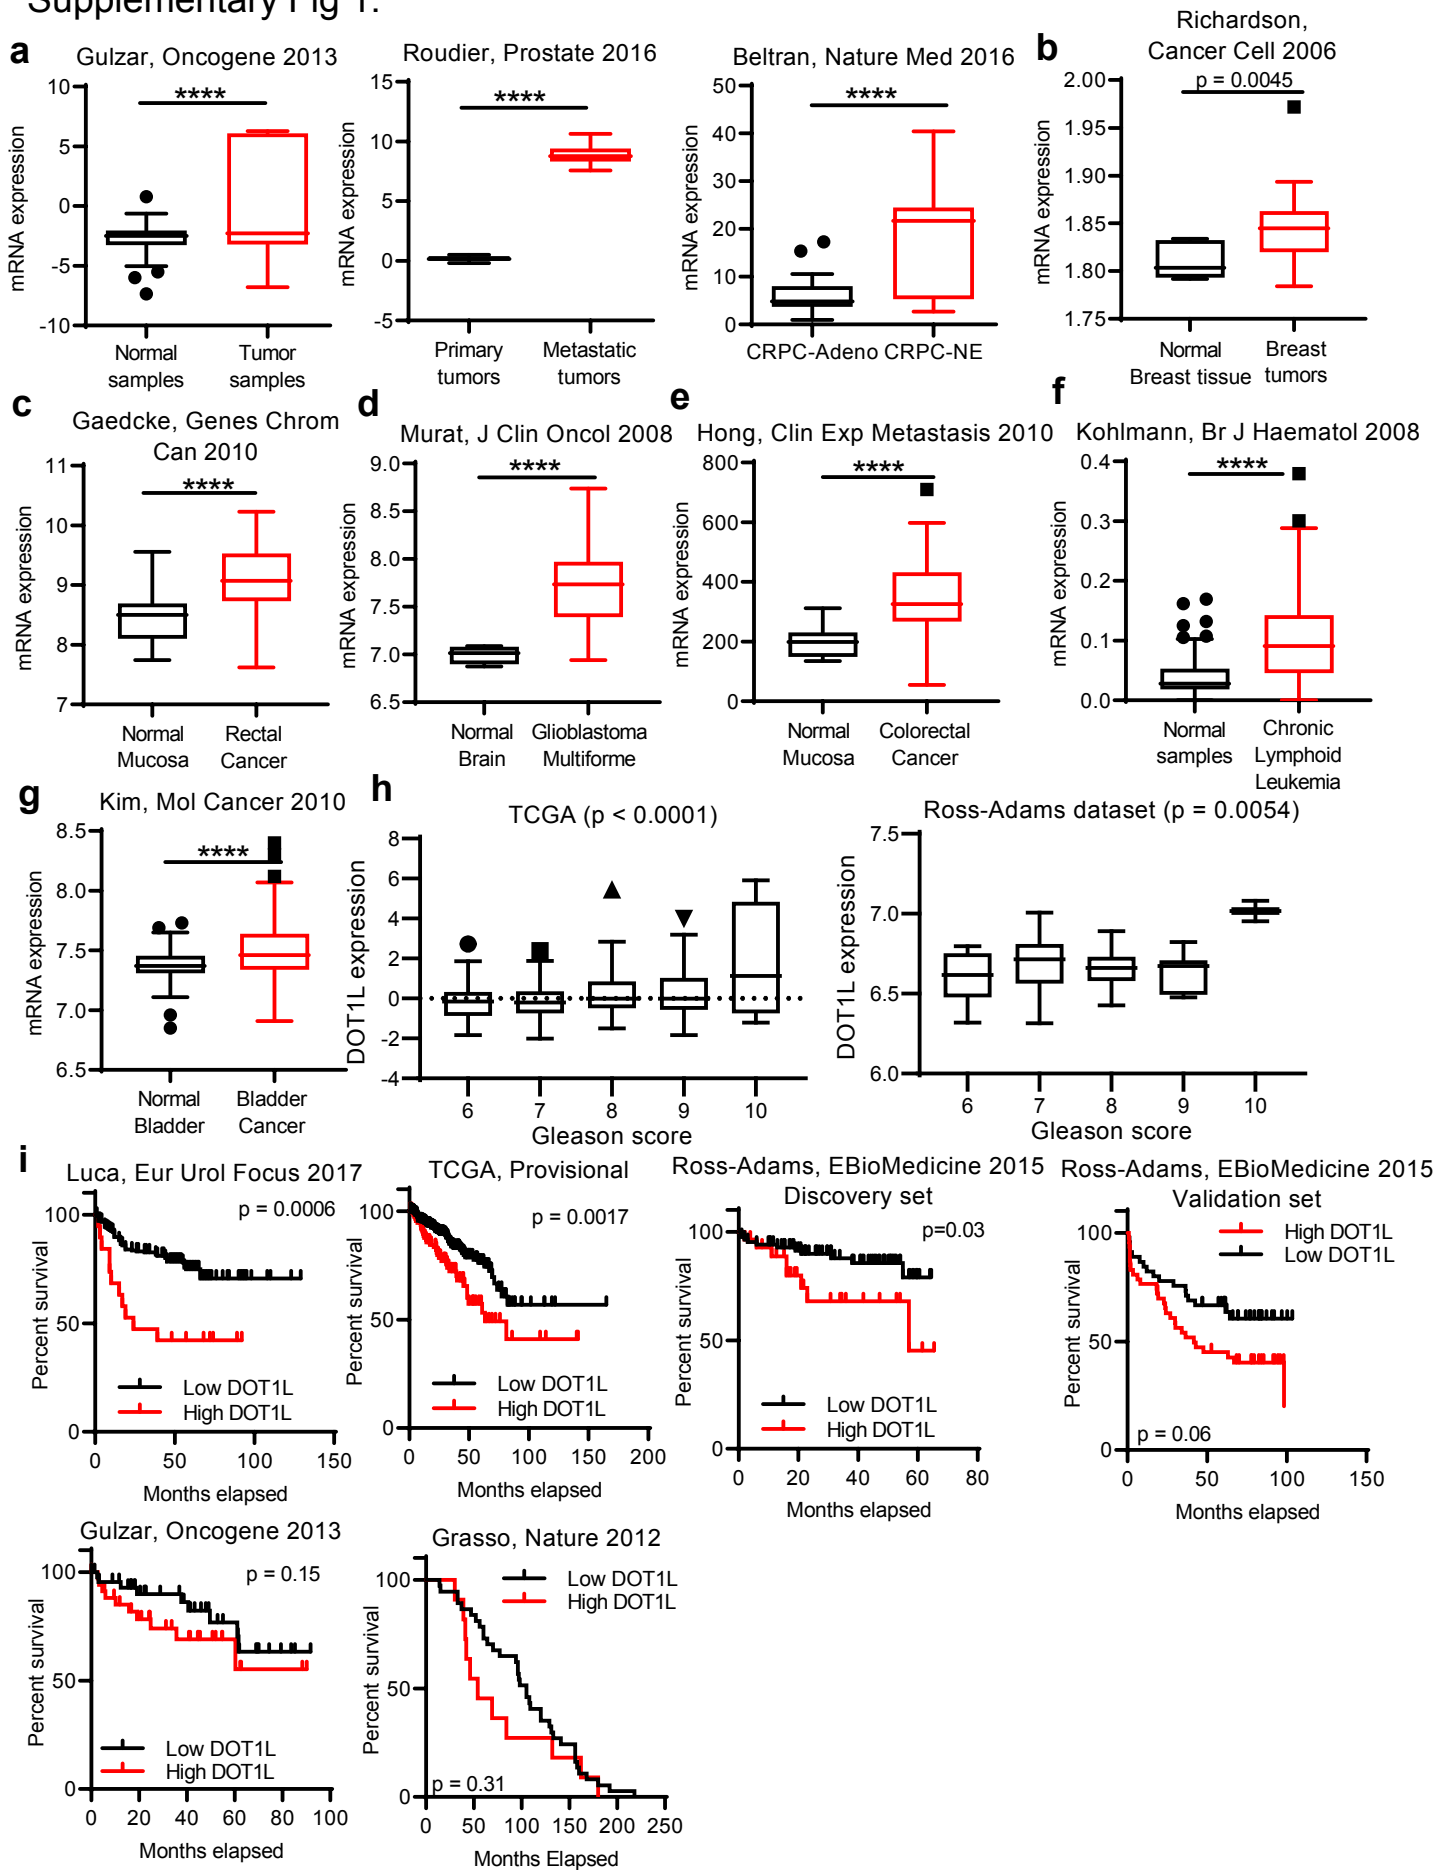

**Supplementary Fig 1:** (a) Comparison of *DOT1L* expression in three cohorts of prostate cancer patients. Data for this analysis was used from Gulzar Prostate cancer dataset [normal (n=66), prostate cancers (n=83) and Beltran dataset [CRPC adenocarcinomas (n=15), the Roudier Prostate cancer dataset [primary cancers (n=11), metastatic cancers (n=45)], CRPC-Neuroendocrine cancers (n=31)]. (b-g) Expression of *DOT1L* in multiple cancer types. Data was used from (b) Richardson Breast cancer dataset [Normal (n=7), Cancer (n=40)], (c) GaedckeRectal cancer dataset [Normal (n=65), Cancer (n=65)], (d) Murat Glioblastoma dataset [Normal (n=4), Cancer (n=80)], (e) Hong Colorectal cancer dataset [Normal (n=12), Cancer (n=70)], (f) Kohlmann CLL dataset [Normal (n=73), Cancer (n=448)], (g) Kim Bladder cancer [Normal (n=68), Cancer (n=188)]. (h) Comparison of *DOT1L* expression with Gleason score in two cohorts of prostate cancer patients. Data was used from TCGA dataset and Ross-Adams discovery set. P-value determined by ANOVA. (i) Disease free Survival analysis of six independent cohorts of prostate cancer patients divided by expression of *DOT1L*. Data for this analysis was used from the Luca CancerMap prostate cancer dataset [Cut-off at 90th percentile, high *DOT1L* (n=19), low *DOT1L* (n=214)], TCGA prostate cancer dataset [Cut-off at 90th percentile, high *DOT1L* (n=33), low *DOT1L* (n=463)], Ross-Adams Discovery dataset [Cut-off at 75th percentile, high *DOT1L* (n=24), low *DOT1L* (n=84)], Ross-Adams Validation dataset [Cutoff at 50<sup>th</sup> percentile High(n=92), Low (n=92), p=0.0632] and Gulzar dataset [Cutoff at 50<sup>th</sup> percentile, High (n=83), Low (n=83), p=0.1535]. Overall survival data was used from Grasso dataset [High (n=48), Low (n=48), p=0.3118]. Statistical tests: P value determined by two-sided Welch's t-test (a-g) and Log-rank test (h-i). For box plots, minima and maxima values are shown (a-g). \*\*\*\*p<0.0001.

# Supplementary Fig 2

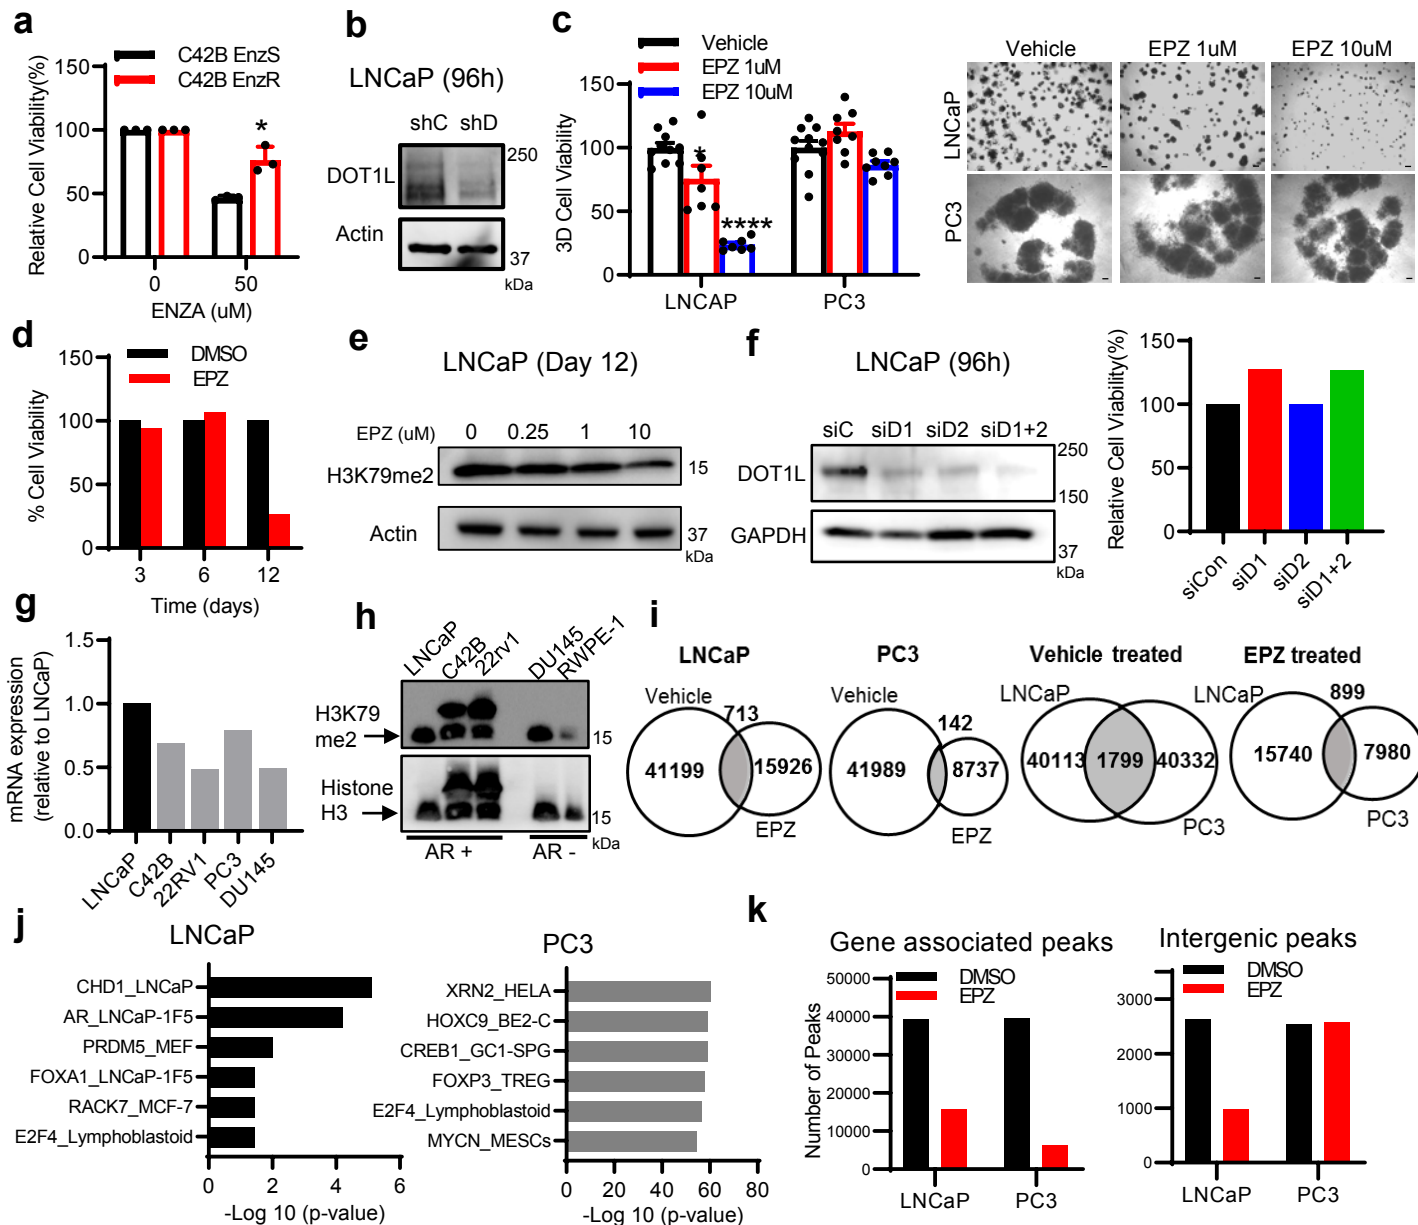

**Supplementary Fig 2:** (a) Cell viability of C42B-EnzS and C42B EnzR cells treated with 50  $\mu$ M Enza for 2 days. (b) DOT1L western blot in LNCaP cells transduced with Luciferase targeting shRNA or DOT1L targeting shRNA (4 days). (c) 3D Cell viability assay in LNCaP and PC3 organoids after 12 days of EPZ treatment. Representative images shown (right). Scale bars indicate 100  $\mu$ M. (d) Cell viability assays performed after 3, 6 and 12 days of treatment with Vehicle or 10  $\mu$ M EPZ in C42B cells. (n=1) (e) H3K79me2 western blot in LNCaP cells after EPZ treatment after 12 days (f) (left) DOT1L western blot (4 days) and (right) Cell viability assays (12 days) in LNCaP cells transfected with Control or 2 single DOT1L targeting siRNA and 1 pool of DOT1L targeting siRNA (n=1) (g) Baseline DOT1L mRNA expression in a panel of Prostate cancer cells – LNCaP, C42B, 22rv1, PC3, DU145. (h) Baseline H3K79me2 western blot in a panel of Prostate cancer cells – LNCaP, C42B, 22rv1, DU145, RWPE-1. (i) Venn diagrams comparing H3K79me2 enriched peaks in LNCaP and PC3 after treatment with Vehicle or 1  $\mu$ M EPZ for 8 days. (j) ChIP Enrichment Analysis (ChEA) of unique H3K79me2 enriched genes from LNCaP and PC3 identified using Enrichr web tool. (k) Comparison of the number of gene associated and intergenic peaks in LNCaP and PC3 cells after treatment with 1  $\mu$ M EPZ for 8 days. Statistical tests: P-values determined by two-tailed student's t-test (a,c). n=3 (a-b,e), n=8 (c), n = 1 (g-h) independent experiments. Error bars represent s.e.m. \*p < 0.05, \*\* p < 0.01, \*\*\* p < 0.001, \*\*\*\*p < 0.0001

# Supplementary Fig 3

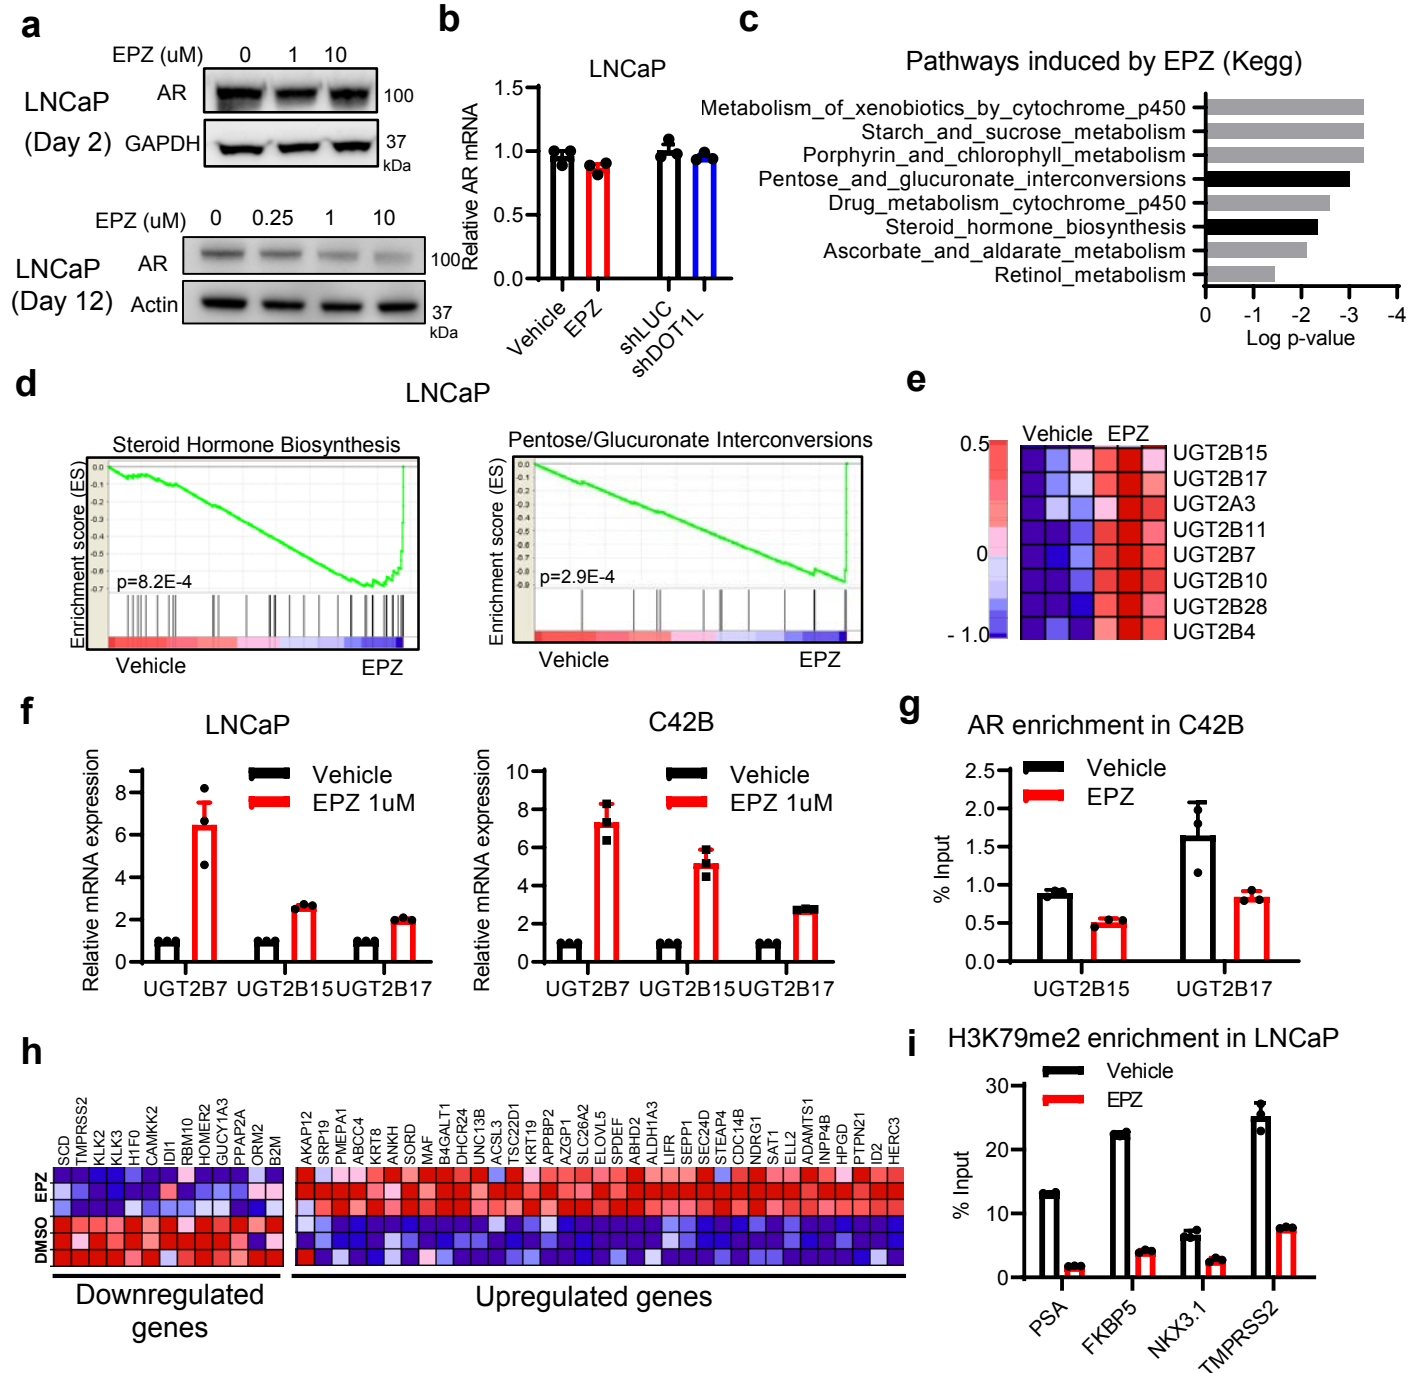

**Supplementary Fig 3:** (a) Western blot analysis of AR in LNCaP cells treated with Vehicle or indicated doses of EPZ for 2 days and 12 days. (b) AR mRNA levels assessed by qPCR in LNCaP cells after EPZ treatment (1uM) and DOT1L knockdown using shRNA after 8 days (c) Top 8 Kegg pathways induced by EPZ identified by GSEA analysis in LNCaP cells after treatment with Vehicle or 1uM EPZ. Bars in black indicate gene-sets of interest. (d) GSEA plot of Steroid\_Hormone\_Biosynthesis geneset (left) and Pentose\_Glucuronate\_Interconversions geneset (right) identified by GSEA analysis in LNCaP cells after treatment with Vehicle or 1uM EPZ for 8 days. (e) Heat map of expression of UGT2B family of genes from leading edge of Pentose\_Glucuronate\_Interconversions gene set. (f) mRNA expression of UGT2B7, 15, and 17 after 1uM EPZ treatment in LNCaP and C42B cells for 8 days. (g) AR enrichment at UGT2B gene promoters in C42B cells after Vehicle/EPZ 1uM treatment for 8 days in C42B cells evaluated by ChIP-qPCR. (h) Heatmap of differentially expressed genes from Nelson\_Response\_To\_Androgen dataset identified by GSEA analysis in LNCaP cells treated with Vehicle or 1uM EPZ. (i) H3K79me2 enrichment at AR target genes in LNCaP cells treated with Vehicle or 1uM EPZ for 8 days measured by ChIP-qPCR. Statistical tests: P-values determined by two-tailed student's t-test (b,f,g,i). n=3 (a-b, f-g,i) independent experiments. Error bars represent s.e.m. For GSEA analysis, adjustments were made for multiple comparisons. (c-d) FDR < 25%. \*p<0.05, \*\*p<0.01, \*\*\*p<0.001, \*\*\*\*p<0.0001

# Supplementary Fig 4

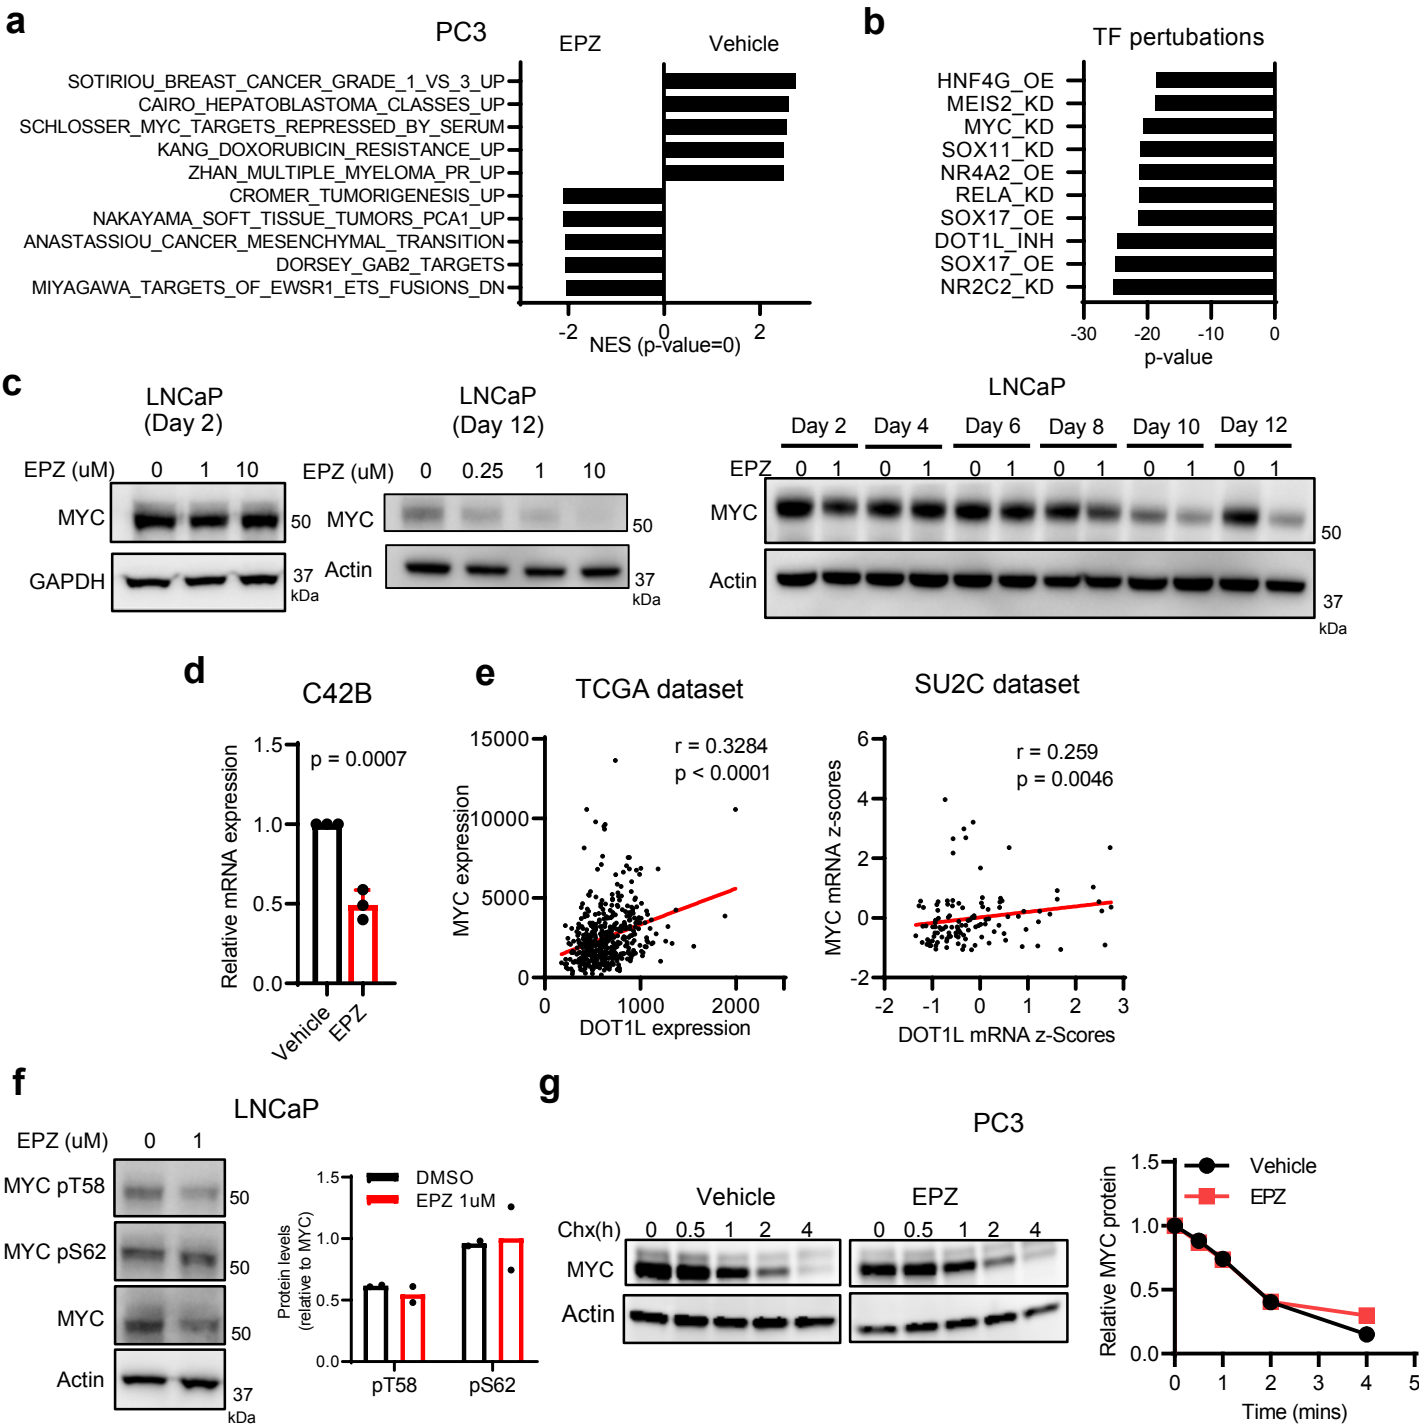

**Supplementary Figure 4:** (a) Top 5 genesets enriched in PC3 Vehicle and EPZ treated cells identified by GSEA analysis (p value=0). (b) Analysis of the leading edge genes from Schlosser\_MYC\_Targets\_Repressed\_By\_Serum identifying gene signatures from single TF perturbations using Enrichr web tool. (c) Western blot analysis of MYC in LNCaP cells treated with Vehicle or EPZ at different time points. (d) mRNA levels of MYC in C42B cells treated with 1uM EPZ and Vehicle for 8 days. (e) Correlations between gene expression of DOT1L & MYC using data from the SU2C dataset (n=118) and TCGA dataset (n=498). P-values were analyzed using Spearman's rank correlation. (f) Western blot analysis of MYC pT58 and pS62 in LNCaP cells treated with Vehicle or EPZ for 8 days followed by quantitation of protein levels. (g) Western blot analysis and quantitation of MYC protein after treatment with 50 ug/ml Cycloheximide in PC3 cells treated with vehicle or 1uM EPZ for 8 days. Statistical tests: P-values determined by two-tailed student's t-test (d). n = 3 (c-d), n = 2 (f), n = 1 (g) independent experiments. Error bars represent s.e.m. For GSEA analysis, adjustments were made for multiple comparisons. (a-b) FDR < 25%. \*p<0.05, \*\* p<0.01, \*\*\* p<0.001, \*\*\*\*p<0.0001

# Supplementary Fig 5

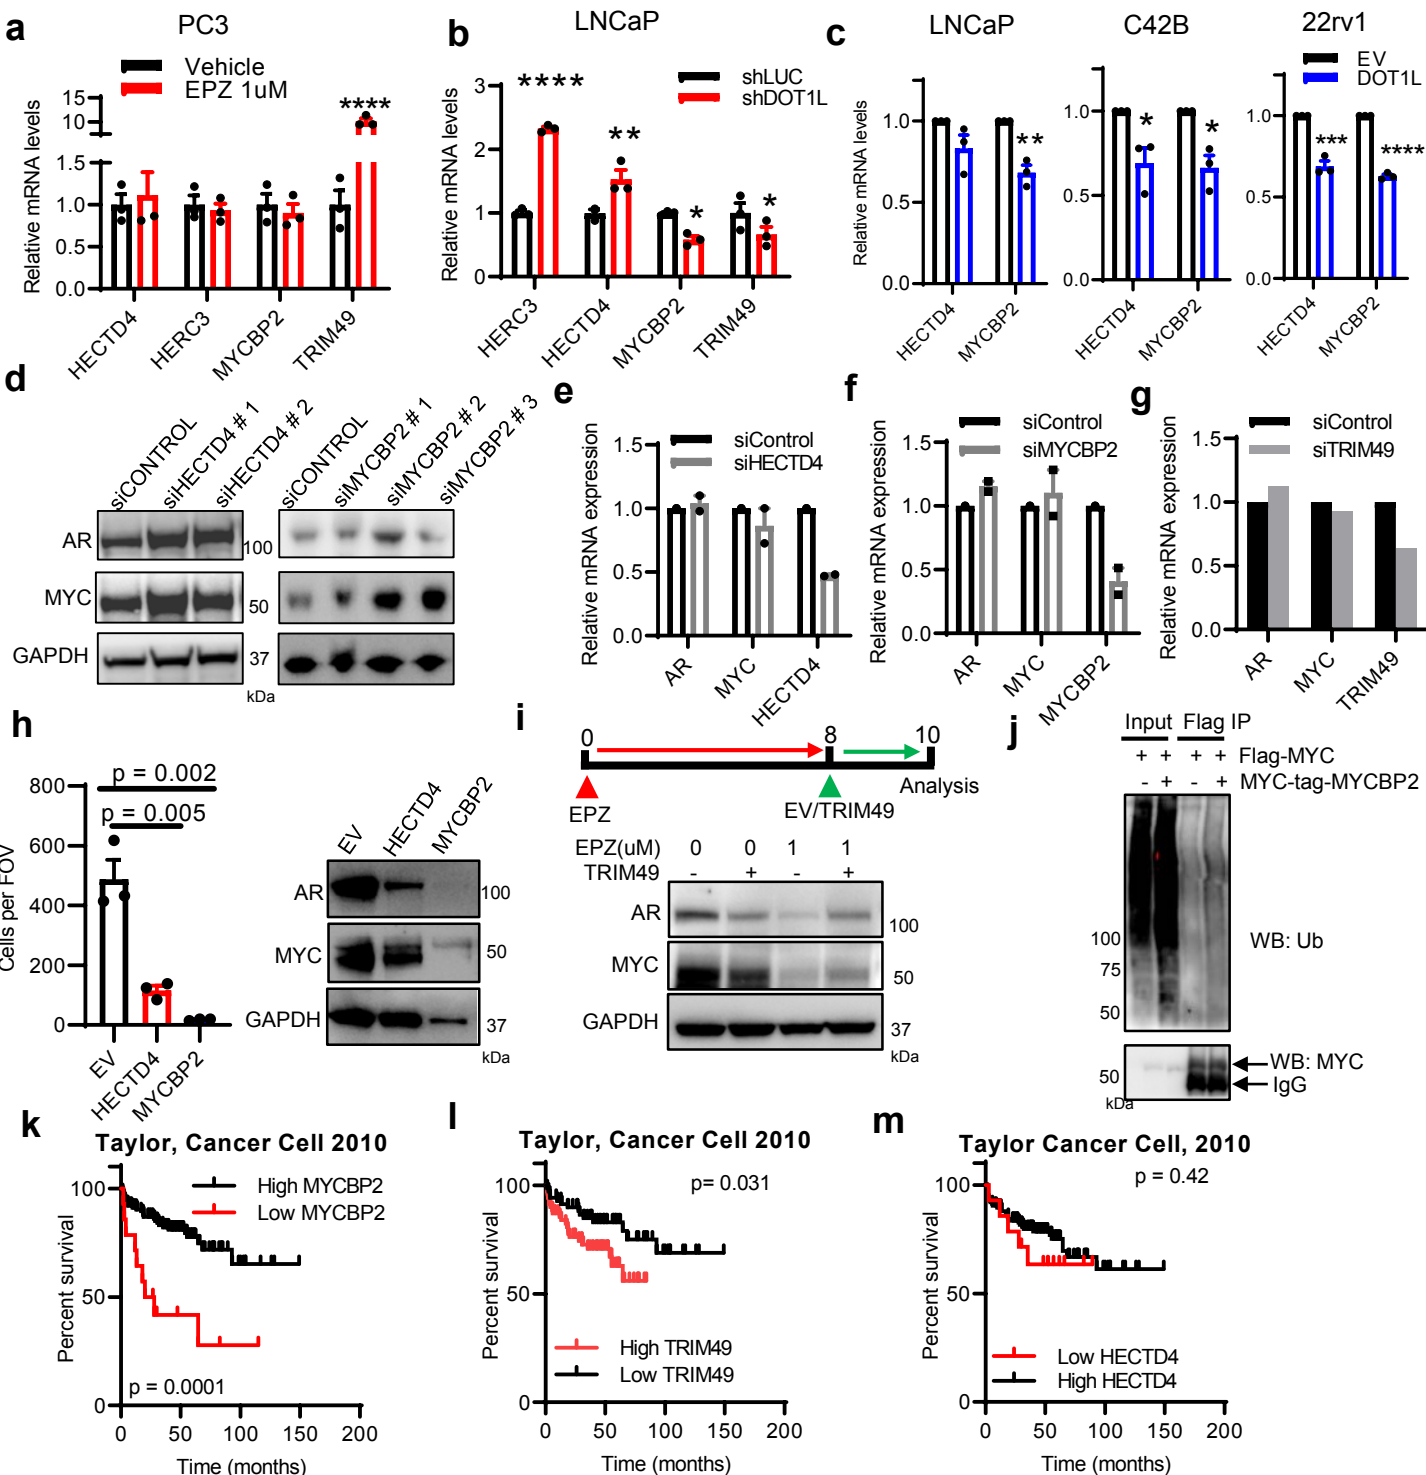

**Supplementary Figure 5:** (a) mRNA expression of the 4 candidate E3 Ubiquitin ligases in PC3 cells after treatment with 1uM EPZ. (b) mRNA expression of the 4 candidate E3 Ubiquitin ligases in LNCaP cells transduced with shControl or shDOT1L lentivirus. (c) *HECTD4* and *MYCBP2* expression in LNCaP, C42B and 22rv1 cells after transduction with EV or DOT1L expressing constructs. (d) AR and MYC western blot in LNCaP cells transfected with Control or HECTD4/MYCBP2 targeting siRNAs after 2 days. (e) HECTD4 targeting siRNA, (f) MYCBP2 targeting siRNA, (g) TRIM49 targeting siRNA for 2 days. (h) (left) Average cells per field of view (FOV) in LNCaP cells transfected with HECTD4 and MYCBP2 constructs for 48h (right) AR and MYC protein levels in LNCaP cells transfected with EV, HECTD4, MYCBP2 constructs. (i) AR and MYC protein levels in LNCaP cells treated with Vehicle or EPZ for 8 days followed by transfection of EV or TRIM49 construct for 2 days. (j) Flag-MYC pulldown followed by Ubiquitin western analysis in 293T cells transfected with both Flag-MYC and MYCBP2 constructs. (k-m) Disease free survival analysis of prostate cancer patients divided by expression of *MYCBP2*, *TRIM49* and *HECTD4*. Data was used from the MSKCC dataset (k) [Cut-off at 10th percentile, high *MYCBP2* (n=126), low *MYCBP2* (n=14)], (l) [Cut-off at median, high *TRIM49* (n=70), low *TRIM49* (n=70)] (m) [Cut-off at 10th percentile, high *HECTD4* (n=126), low *HECTD4* (n=14)]. Statistical tests: P value determined by two tailed t-test (a-c,h), Log-rank test (k-m). n = 3 (a-c,h), n = 2 (e-f,i-j) independent experiments. Error bars represent s.e.m \*p<0.05, \*\* p<0.01, \*\*\* p<0.001, \*\*\*\*p<0.0001

# Supplementary Fig 6.

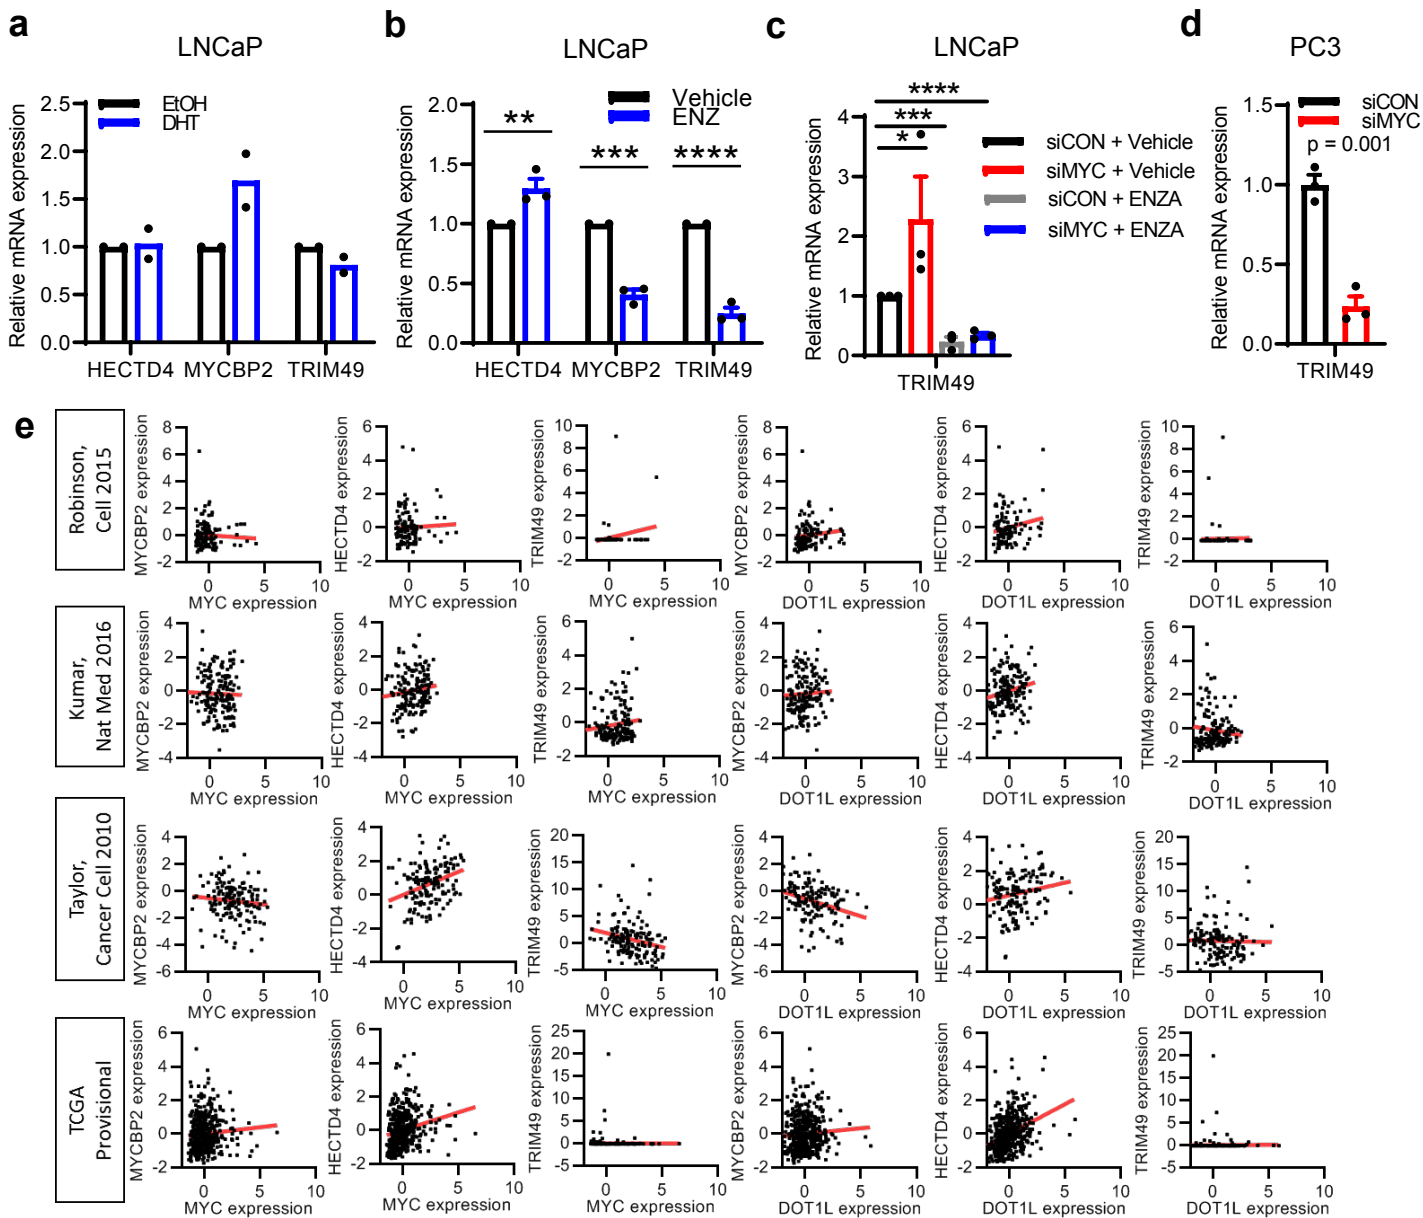

**Supplementary Figure 6:** (a) mRNA expression of *HECTD4*, *MYCBP2* and *TRIM49* in LNCaP treated with Control or 10nM DHT for 24 hours in Charcoal stripped media (b) mRNA expression of *HECTD4*, *MYCBP2* and *TRIM49* in LNCaP treated with Control or 20uM ENZA for 24 hours. (c) mRNA expression of *TRIM49* in LNCaP cells transfected with Control or MYC targeting siRNA (2 days) followed by treatment with Vehicle or 20uM ENZA (2 days). (d) mRNA expression of *TRIM49* in PC3 cells transfected with Control or MYC targeting siRNA for 2 days. (e) Correlation between MYC or DOT1L expression and expression of the three E3 ligases *MYCBP2*, *HECTD4*, *TRIM49*. Statistical tests: P value determined by two –tailed Welch’s t-test (b-d). n = 2 (a), n=3 (b-d) independent experiments Error bars represent s.e.m \*p< 0.05, \*\* p<0.01, \*\*\* p<0.001, \*\*\*\*p<0.0001



# Supplementary Fig 7.

**a**

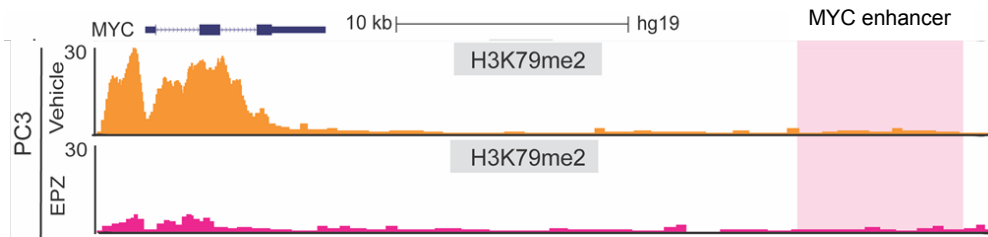

**b**

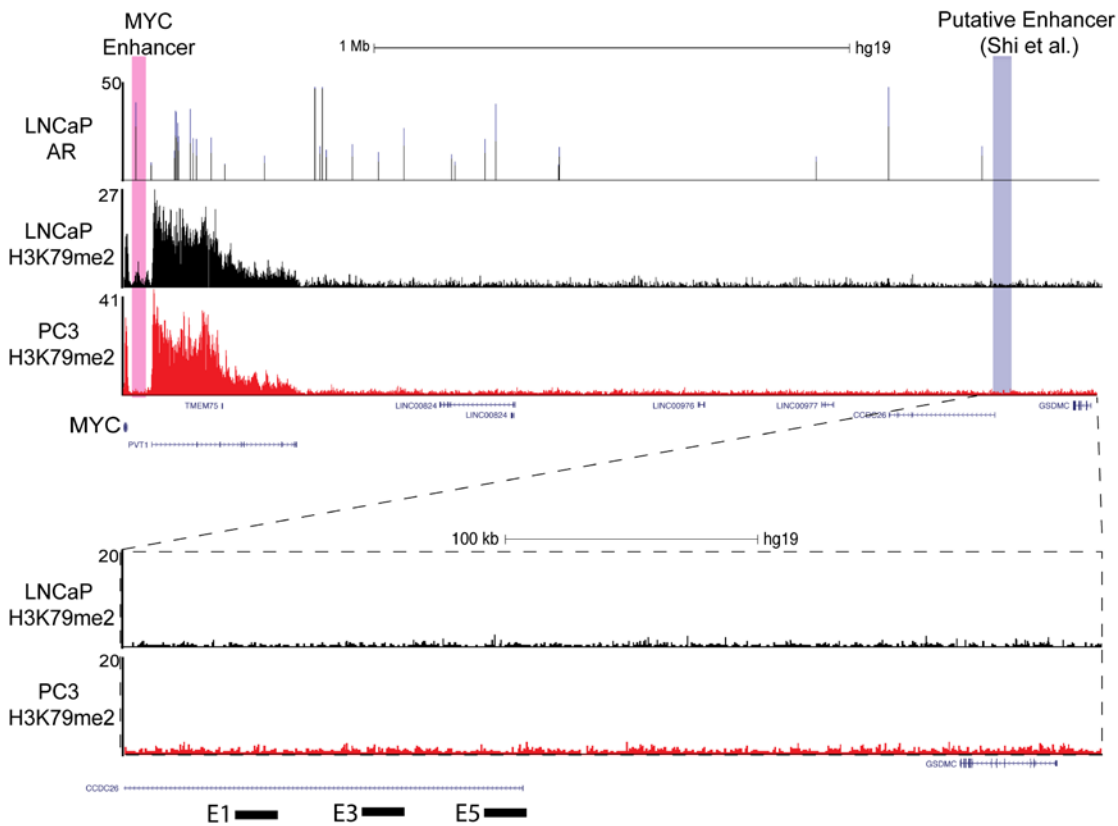

**c**

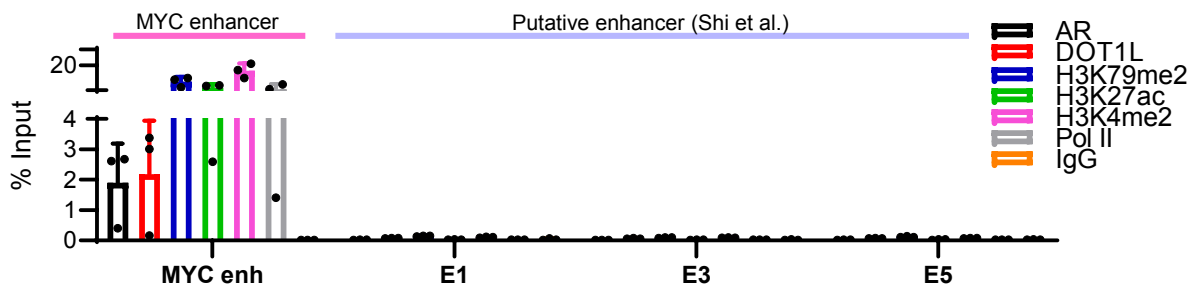

**Supplementary Figure 7:** (a) ChIP-seq tracks of H3K79me2 in Vehicle and EPZ treated PC3 cells (EPZ 1uM, 8 days) (b) ChIP-seq tracks (hg19) of AR (GSM353644) in LNCaP cells and H3K79me2 in Vehicle and EPZ treated PC3 cells (EPZ 1uM, 8 days) at the putative enhancer identified previously by Shi et al. (c) Enrichment of AR, DOT1L, H3K79me2, H3K27ac, H3K4me2 and RNA Pol II in LNCaP cells (vehicle treated) at the previously identified Putative enhancer at the indicated sites. The MYC enhancer data from Figure 7e for LNCaP DMSO is shown here for comparison. Statistical tests: P-values determined by two-tailed student's t-test  $n = 3$  (c) independent experiments. Error bars represent s.e.m. \* $p < 0.05$ , \*\*  $p < 0.01$ , \*\*\*  $p < 0.001$ , \*\*\*\* $p < 0.0001$

# Supplementary Fig 8.

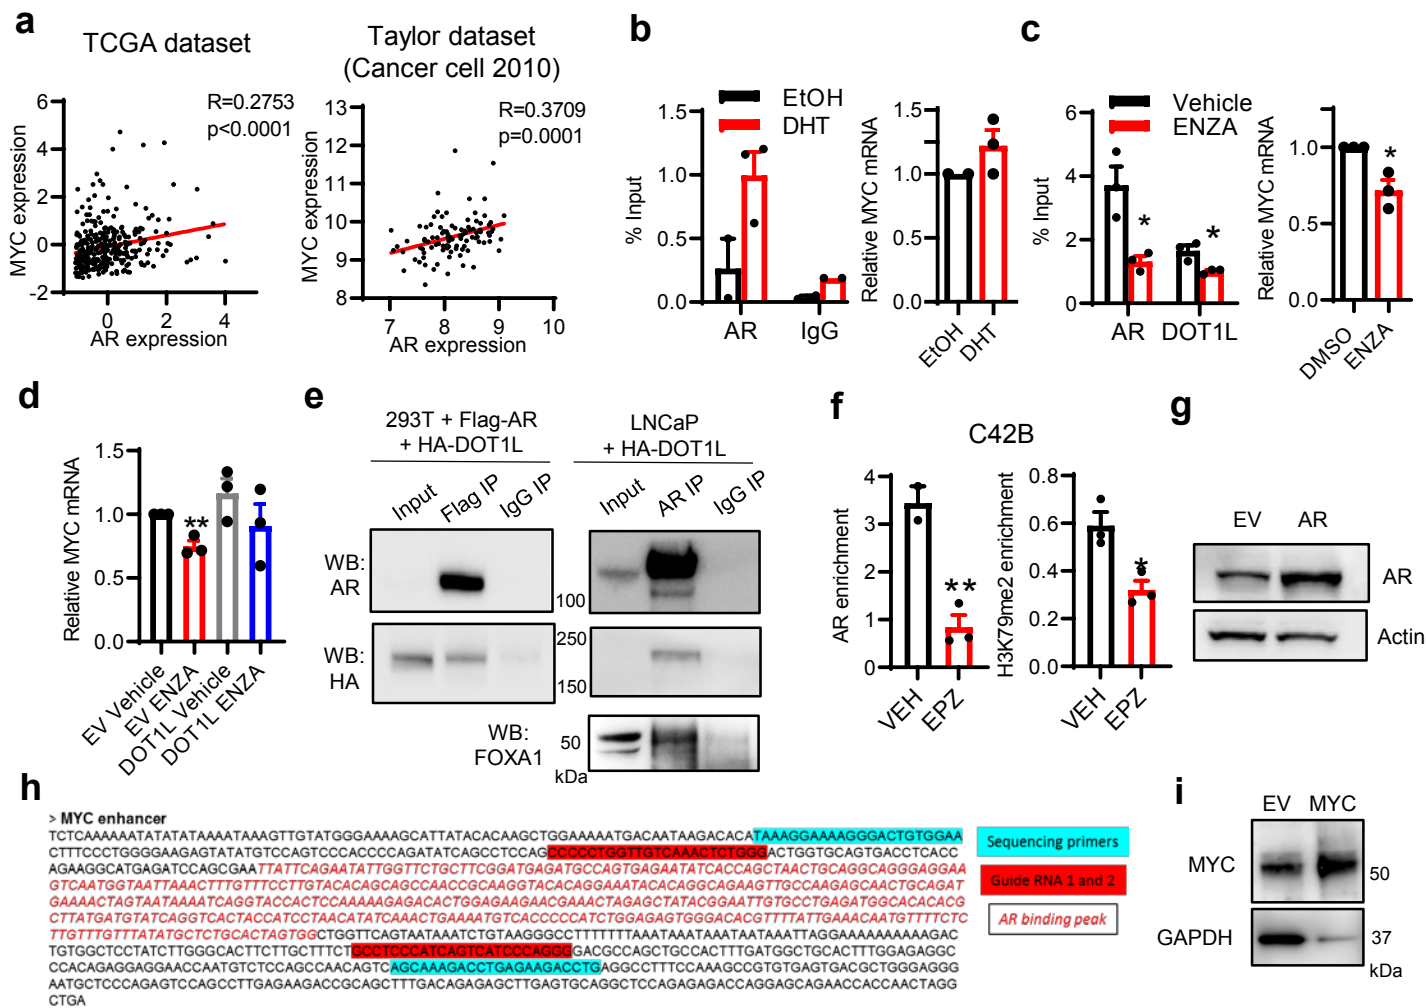

**Supplementary Figure 8:** (a) Correlations between gene expression of AR & MYC using data from the MSKCC dataset (n=101) and TCGA dataset (n=336) excluding patients with MYC amplifications. P-values were analyzed using Spearman's rank correlation. (b) (left) AR enrichment at MYC enhancer in LNCaP cells treated with Vehicle or DHT for 3 hours after 24 hours of hormone starvation in Charcoal stripped medium. (right) MYC expression in LNCaP cells treated with Vehicle or DHT for 24 hours after 24 hours of hormone starvation in Charcoal stripped medium. (c) (left) AR and DOT1L enrichment at MYC enhancer in LNCaP cells treated with Vehicle or ENZA for 24 hours (right) MYC expression in LNCaP cells treated with Vehicle or ENZA for 24 hours (d) MYC expression in LNCaP cells transduced with EV or DOT1L and treated with Vehicle or Enza for 24 hours. (e) (left) HA western blot performed after Flag pulldown in 293T cells expressing both Flag-AR and HA-DOT1L constructs. (right) HA and FOXA1 western blot after Flag pulldown in LNCaP cells expressing HA-DOT1L (f) (left) Enrichment of AR and H3K79me2 at the MYC enhancer in C42B cells treated with Vehicle or 1uM EPZ for 8 days. (g) AR protein expression in LNCaP cells transduced with EV or wild-type AR. (h) Sequence of the AR binding peak (red text) within the MYC enhancer. Sequencing primers are highlighted in blue and the guide RNAs in red. (i) MYC protein expression in LNCaP cells transfected with EV or MYC constructs after 2 days. Statistical tests: P-values determined by two-tailed student's t-test (a-d,f). n = 3 (a-d,f,g,i), n = 4 (e) independent experiments. Error bars represent s.e.m. \*p<0.05, \*\* p<0.01, \*\*\* p<0.001, \*\*\*\*p<0.0001

Supplementary Fig 9.

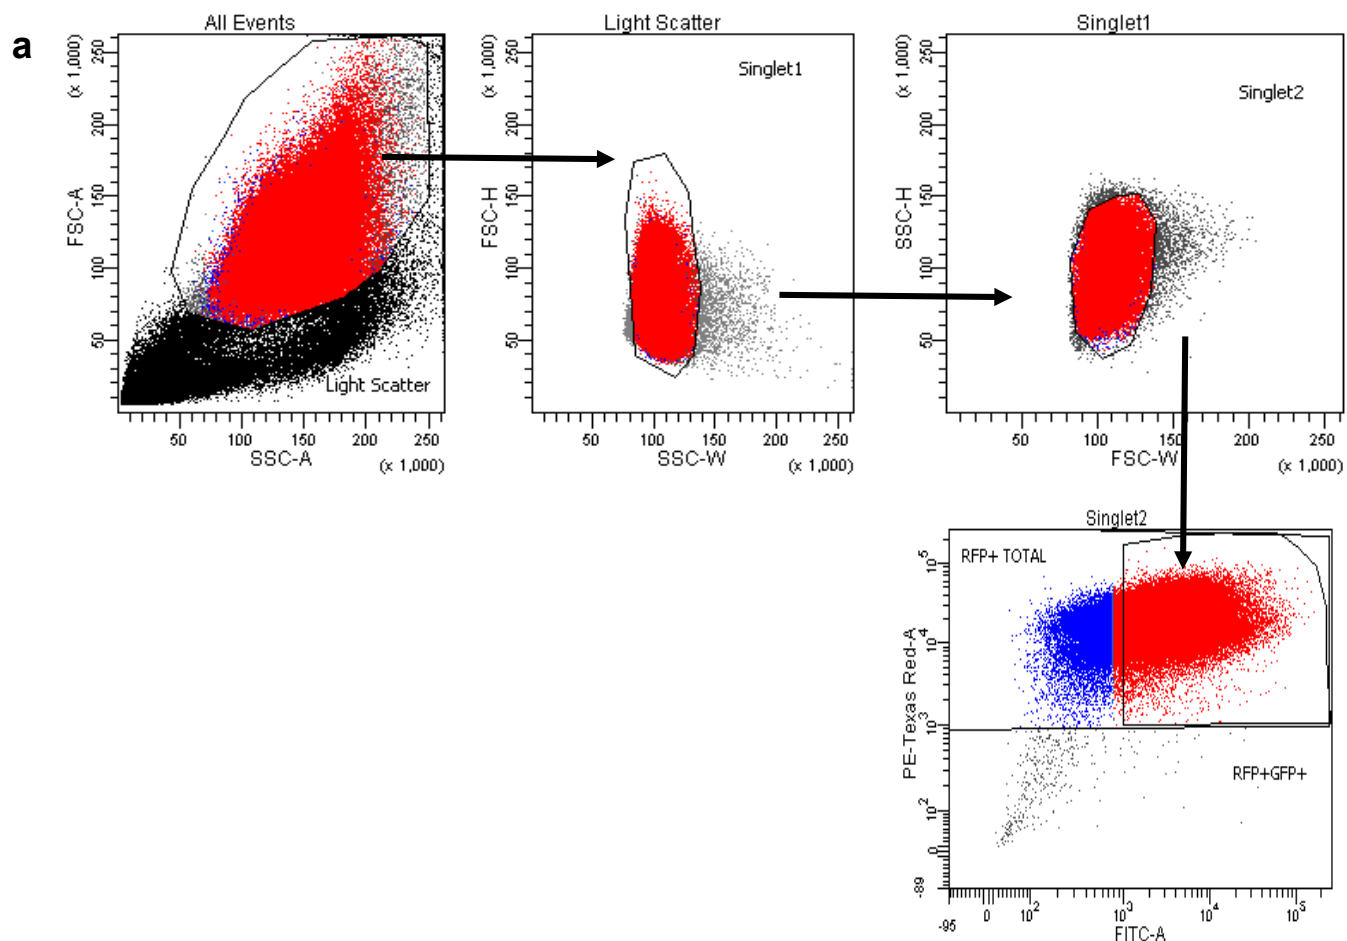

**Supplementary Figure 9:** (a) Gating strategy of flow cytometry analysis on LNCaP cells treated with Vehicle in the study described in Figure 3i. For all the analysis, the initial gating was performed on overall morphology, singlets, live cells, followed by RFP+GFP+ cells. SSC-A = Side Scatter-Area, FSC-A = Forward Scatter-Area, FSC-H = Forward Scatter-Height, FSC-W = Forward Scatter-width, SSC-W = Side Scatter-Width, SSC-H = Side Scatter-Height, FITC-A - Fluorescein isothiocyanate (FITC)-A, PE-Texas Red-A

**Supplementary Table 1. qRT-PCR primers**

| <b>Name</b> | <b>Sequence</b>              |
|-------------|------------------------------|
| PSA_F       | TGTGTGCTGGACGCTGGA           |
| PSA_R       | CACTGCCCCATGACGTGAT          |
| TMPRSS2_F   | GGACAGTGTGCACCTCAAAGAC       |
| TMPRSS2_R   | TCCCACGAGGAAGGTCCC           |
| AR-FL_F     | TCTTGTCGTCTTCGAAATGT         |
| AR-FL_R     | AAGCCTCTCCTTCCTCCTGTA        |
| DOT1L_F     | CAAGTTCTCGCTGCCTCACT         |
| DOT1L_R     | GTCCTGAGGGCTCAGCTTC          |
| 18SrRNA_F   | GTAACCCGTTGAACCCATT          |
| 18SrRNA_R   | CCATCCAATCGGTAGTAGCG         |
| UGT2B15_F   | GTGTTGGGAATATTATGACTACAGTAAC |
| UGT2B15_R   | GGGTATGTTAAATAGTTCAGCCAGT    |
| UGT2B17_F   | TTTTGTGCGCAGGAAAAAGGAAA      |
| UGT2B17_R   | AAGCCTGAAGTGGAATGACCAA       |
| UGT2B7_F    | TTTCACAAGTACAGGAAATCATGTCAAT |
| UGT2B7_R    | CAGCAGCTCACTACAGGGAAAAAT     |
| HERC3_F     | CTCTGGCAGATCAGCATATCATT      |
| HERC3_R     | CAGCTTTTGTATTAACCTGGGCA      |
| MYCBP2_F    | AGTCTTGGTTAGGGTATGCTCA       |
| MYCBP2_R    | GGGCTTATCCTTATGGCTGTCAT      |
| ELL2_F      | CATCACCGTACTGCATGTGAA        |
| ELL2_R      | ACTGGATTGAAGGTCGAAAAGG       |
| NDRG1_F     | CTCCTGCAAGAGTTTGATGTCC       |
| NDRG1_R     | TCATGCCGATGTCATGGTAGG        |
| ABCC4_F     | AGCTGAGAATGACGCACAGAA        |
| ABCC4_R     | ATATGGGCTGGATTACTTTGGC       |
| TRIM49_F    | GAACGAAATGTGCCATAAACCAG      |
| TRIM49_R    | TGCAGAGTAATATGCACTCGGAA      |
| HECTD4_F    | GACCGAAGACAGCCCAAAGA         |
| HECTD4_R    | AGAACATGCAGGCTCGAACA         |
| MYC_F       | TTCGGGTAGTGGAAAACCAG         |
| MYC_R       | CAGCAGCTCGAATTTCTTCC         |

**Supplementary Table 2. ChIP qPCR primers**

| <b>Name</b>        | <b>Sequence</b>          | <b>Purpose</b>    |
|--------------------|--------------------------|-------------------|
| PSA_F              | CAGAGACCTTGATGCTTGGC     | H3K79me2 ChIP     |
| PSA_R              | CCAGACTGAGGGACCCATTT     | H3K79me2 ChIP     |
| PSA_F              | ACAGACCTACTCTGGAGGAAC    | AR ChIP           |
| PSA_R              | AAGACAGCAACACCTTTTT      | AR ChIP           |
| TMPRSS2_F          | TAGCAACACCCTCGGGTAAG     | H3K79me2 ChIP     |
| TMPRSS2_R          | AAATAACCAGAGGCCGAGGT     | H3K79me2 ChIP     |
| TMPRSS2_F          | TGGTCCTGGATGATAAAAAAGTTT | AR ChIP           |
| TMPRSS2_R          | ACATACGCCCCACAACAGA      | AR ChIP           |
| UGT2B15_F          | TCATGACCCCTCTGAACAAGC    | AR ChIP           |
| UGT2B15_R          | CTCTGGAAGCTGTGGAAAGGT    | AR ChIP           |
| UGT2B17_F          | TGAGCTGCATCAGCAGAAAGA    | AR ChIP           |
| UGT2B17_R          | AAGCACTGCATAAGACCAGGA    | AR ChIP           |
| HERC3_F            | GGGGACCAAGAAACACCTTT     | AR ChIP           |
| HERC3_R            | GGAGGGAAAAGCACTGACTG     | AR ChIP           |
| ELL2_F             | CCCATTTCAGAACAGAAAGTCC   | AR ChIP           |
| ELL2_R             | TTTGCTTGCAGTTACCCAAA     | AR ChIP           |
| ABCC4_F            | TAGCTCTGCACGAAACTGGA     | AR ChIP           |
| ABCC4_R            | TTGAGTCCCGTCTGTTTTCC     | AR ChIP           |
| MYC_F              | GCAGGGAGGAAGTCAATGGT     | Enhancer          |
| MYC_R              | TCATCTGCAGTTGCTCTTGG     | Enhancer          |
| FKBP5_F            | ACCCTTCAGTGTGGTTCAGG     | H3K79me2 ChIP     |
| FKBP5_R            | ACCACGAGCTCAAAGTCTT      | H3K79me2 ChIP     |
| NKX3.1_F           | GATGGGTGGGAGGAGATGA      | H3K79me2 ChIP     |
| NKX3.1_R           | TGTCTTGGACAAGCGGAG       | H3K79me2 ChIP     |
| E1_F               | AGGAGCCCACCTTCTCATT      | Putative enhancer |
| E1_R               | ACATTGCAAGAGTGGCTGTG     | Putative enhancer |
| E3_F               | TGGCAGTGGTCACAGTTCTC     | Putative enhancer |
| E3_R               | CTCTGCACCTTGAGCATTGA     | Putative enhancer |
| E5_F               | CAATACTTTCCGGCCATTTT     | Putative enhancer |
| E5_R               | GACGTTGGCCACTTCATCTT     | Putative enhancer |
| Negative control_F | GGTCAGGCCAACTTGATTGT     | Negative control  |
| Negative control_R | AATTTGTGTTGGGCCACATT     | Negative control  |
| HECTD4_F           | GTCCGAGTCGCCATACCC       | MYC ChIP          |
| HECTD4_R           | CAACATGGCGTCTCACTGAC     | MYC ChIP          |
| MYCBP2_F           | CTCCTCGCACATGCTCAGTA     | MYC ChIP          |
| MYCBP2_R           | ACTTCAGATTCCGCACAACC     | MYC ChIP          |
| CDC25A_F           | GTGAAGGCGCTATTTGGCG      | MYC ChIP          |
| CDC25A_R           | TGGTTGCTCATAATCACTGCC    | MYC ChIP          |
| MYB_F              | CCAAGTTCACGCAGACCT       | MYC ChIP          |
| MYB_R              | CTTCTGATGCTGGTGCCATT     | MYC ChIP          |
