# Supplementary material for: Histone methyltransferase DOT1L coordinates AR and MYC stability in prostate cancer
Source: PubMed Central journal article supplement (PMC7438336; doi:10.1038/s41467-020-18013-7), 2020-08-19
Supplement: 41467_2020_18013_MOESM3_ESM.pdf [file 41467_2020_18013_MOESM3_ESM.pdf]

## **Description of Additional Supplementary Files**

File Name: Supplementary Data 1

Description: A list of proteins identified by Mass spectrometry performed after AR pulldown in LNCaP cells treated with Vehicle and 1uM EPZ004777 for 8 days.
